# Supplementary material for: Impact of V-box insertion on promoter activity and virus-inducibility in transgenic Arabidopsis thaliana
Source: PeerJ. 2025 Oct 31;13:e20178. doi: 10.7717/peerj.20178 (PMC12581914; doi:10.7717/peerj.20178)
Supplement: Supplemental Information 2 [file peerj-13-20178-s002.xlsx]

## Sheet: Relative expression levels
Combination number	Factor A: Promoter	Factor B: V-box site	Factor C:Inudcers	Relative expression level
1	WGFS	Downstream	ABA	0.732
2	WGFS	Downstream	SA	0.807
3	GWSF	CK	ABA	0.17
4	GWSF	Midstream	CK1	0.169
5	WGFS	Upstream	ABA	0.06
6	WGFS	Midstream	SA	1.945
7	WGFS	Midstream	CK1	0.901
8	GWSF	CK	Eth	5.225
9	WGFS	Midstream	TMV	1.514
10	WGFS	Midstream	CK1	0.895
11	GWSF	Downstream	CK1	0.582
12	WGFS	Upstream	TMV	0.159
13	WGFS	CK	SA	0.46
14	WGFS	Midstream	TMV	1.503
15	GWSF	Midstream	TMV	0.2
16	WGFS	Downstream	CK1	0.646
17	GWSF	Downstream	TMV	3.063
18	GWSF	CK	Eth	5.837
19	WGFS	CK	SA	0.401
20	GWSF	CK	ABA	0.164
21	WGFS	Downstream	SA	0.768
22	WGFS	CK	ABA	0.599
23	WGFS	CK	TMV	0.195
24	WGFS	Downstream	Eth	1.05
25	GWSF	Downstream	ABA	0.809
26	WGFS	Midstream	SA	2.144
27	WGFS	Upstream	CK1	0.046
28	WGFS	Downstream	SA	0.717
29	GWSF	CK	CK1	0.103
30	GWSF	CK	Eth	6.706
31	WGFS	Upstream	Eth	0.31
32	GWSF	Upstream	SA	0.283
33	WGFS	Midstream	Eth	1.028
34	GWSF	CK	ABA	0.15
35	WGFS	Midstream	Eth	1.094
36	GWSF	CK	CK1	0.094
37	WGFS	Upstream	SA	0.27
38	GWSF	Upstream	ABA	0.726
39	GWSF	CK	CK1	0.094
40	GWSF	Upstream	CK1	0.173
41	GWSF	Upstream	ABA	0.578
42	GWSF	Midstream	SA	1.395
43	GWSF	Downstream	SA	0.399
44	GWSF	Midstream	Eth	0.875
45	GWSF	Downstream	Eth	0.723
46	WGFS	Downstream	Eth	1.253
47	WGFS	Downstream	ABA	0.727
48	WGFS	Midstream	Eth	1.141
49	WGFS	Midstream	ABA	1.173
50	GWSF	Midstream	SA	1.157
51	WGFS	Upstream	TMV	0.161
52	GWSF	Upstream	Eth	0.053
53	WGFS	Downstream	TMV	1.868
54	WGFS	CK	Eth	0.818
55	GWSF	Upstream	Eth	0.057
56	WGFS	Downstream	ABA	0.763
57	WGFS	Downstream	TMV	1.846
58	GWSF	Downstream	SA	0.35
59	WGFS	CK	Eth	0.79
60	WGFS	Upstream	Eth	0.361
61	GWSF	CK	TMV	0.106
62	GWSF	Downstream	TMV	3.169
63	WGFS	Midstream	ABA	1.181
64	GWSF	Upstream	TMV	0.125
65	WGFS	Downstream	CK1	0.607
66	GWSF	Midstream	CK1	0.148
67	GWSF	Upstream	CK1	0.171
68	WGFS	Midstream	ABA	0.973
69	WGFS	Upstream	ABA	0.061
70	GWSF	Downstream	ABA	0.739
71	GWSF	Upstream	TMV	0.105
72	GWSF	Upstream	Eth	0.045
73	GWSF	Upstream	CK1	0.169
74	WGFS	Downstream	Eth	1.275
75	GWSF	CK	SA	0.674
76	GWSF	Downstream	SA	0.309
77	GWSF	Midstream	Eth	0.793
78	GWSF	Midstream	Eth	0.719
79	WGFS	Upstream	ABA	0.067
80	WGFS	CK	ABA	0.507
81	WGFS	Midstream	SA	2
82	WGFS	Upstream	SA	0.264
83	GWSF	CK	TMV	0.096
84	WGFS	CK	CK1	0.168
85	GWSF	Midstream	ABA	0.525
86	GWSF	Downstream	TMV	3.114
87	WGFS	CK	CK1	0.17
88	WGFS	CK	Eth	0.722
89	GWSF	Midstream	TMV	0.181
90	WGFS	Upstream	CK1	0.049
91	WGFS	CK	CK1	0.143
92	WGFS	Downstream	CK1	0.547
93	WGFS	Upstream	Eth	0.314
94	WGFS	Midstream	TMV	1.403
95	WGFS	Midstream	CK1	0.835
96	GWSF	Upstream	SA	0.221
97	GWSF	Downstream	CK1	0.438
98	GWSF	Midstream	CK1	0.144
99	GWSF	Midstream	SA	1.028
100	GWSF	Midstream	ABA	0.633
101	WGFS	CK	ABA	0.49
102	WGFS	Downstream	TMV	1.912
103	GWSF	Midstream	ABA	0.674
104	GWSF	Upstream	TMV	0.115
105	GWSF	Downstream	CK1	0.438
106	WGFS	Upstream	SA	0.196
107	GWSF	Upstream	SA	0.264
108	GWSF	Downstream	Eth	0.639
109	GWSF	CK	SA	0.753
110	WGFS	Upstream	TMV	0.152
111	GWSF	Downstream	Eth	0.641
112	WGFS	CK	TMV	0.196
113	GWSF	Midstream	TMV	0.161
114	GWSF	Downstream	ABA	0.77
115	GWSF	CK	SA	0.732
116	GWSF	Upstream	ABA	0.582
117	WGFS	CK	TMV	0.165
118	GWSF	CK	TMV	0.082
119	WGFS	Upstream	CK1	0.047
120	WGFS	CK	SA	0.316
